# Supplementary material
Source: PubMed Central journal article supplement (PMC5930413)
Supplement: supp_TIR118.000671_135861_0_supp_70661_p3qzlq.pdf [file supp_TIR118.000671_135861_0_supp_70661_p3qzlq.pdf]

**Figure S1**

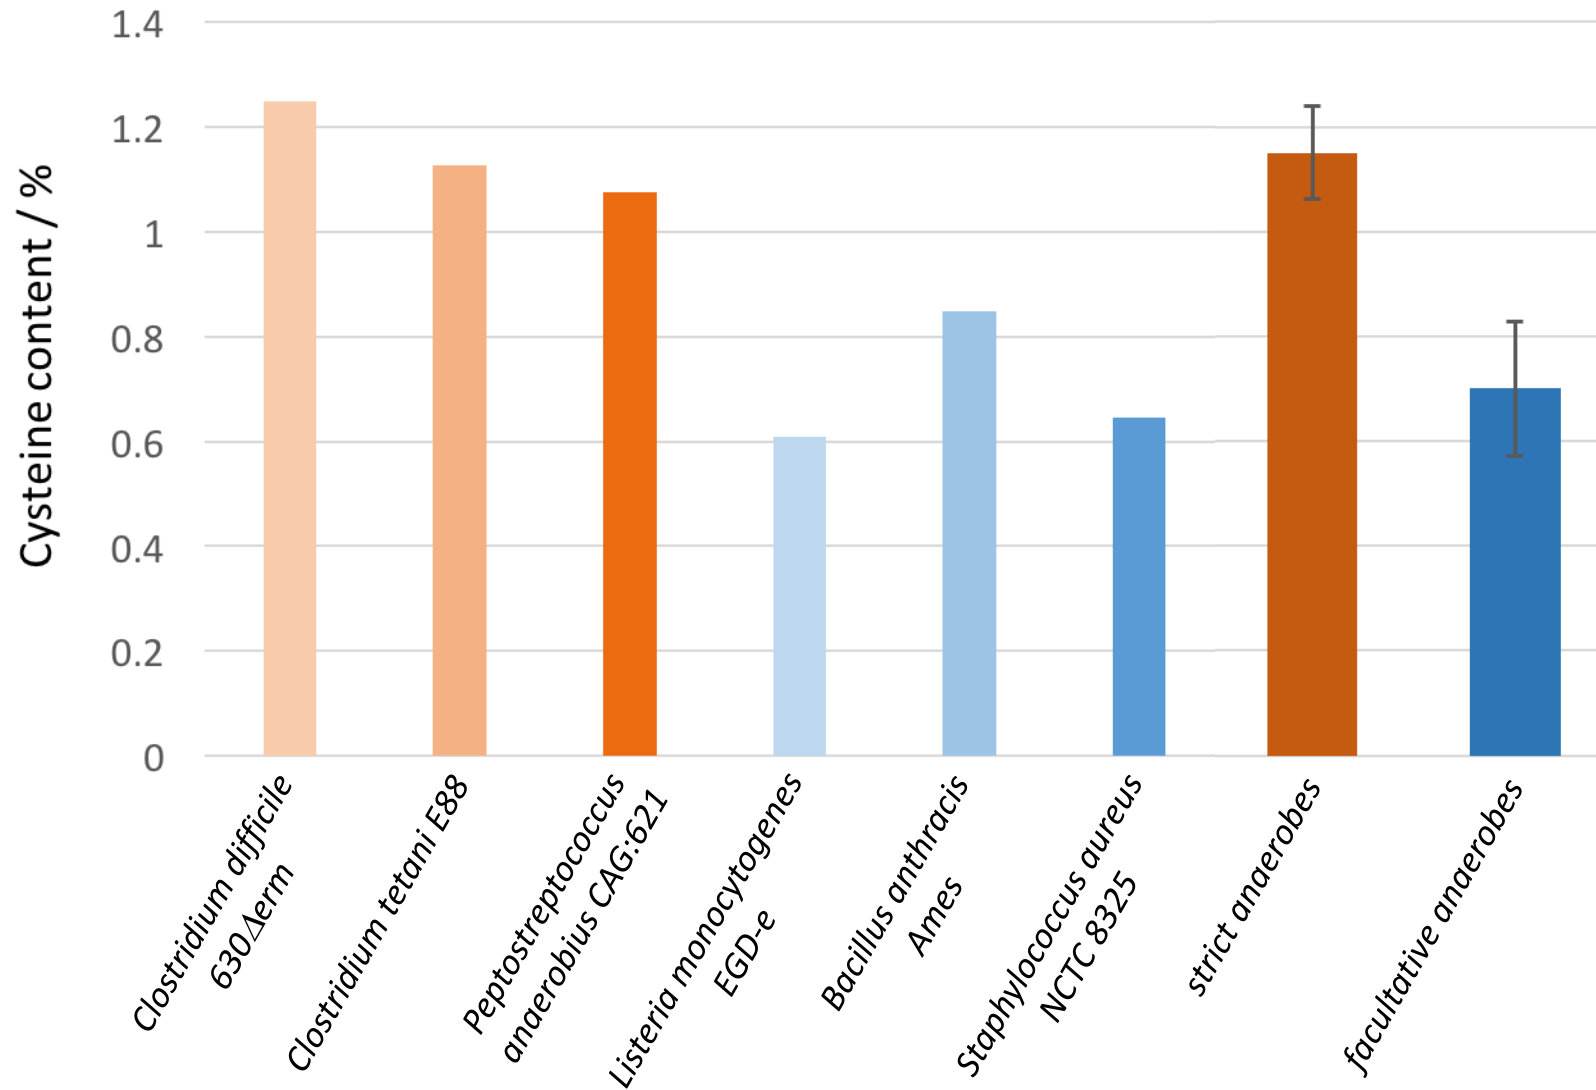

**Fig. S1:** Cysteine content of the proteomes of three strictly anaerobic pathogenic bacteria (brown color) and three facultative anaerobic pathogenic bacteria (blue). The three strict anaerobes exhibit a statistically higher content of cysteine than the three facultatively anaerobic bacteria.

**Figure S2**

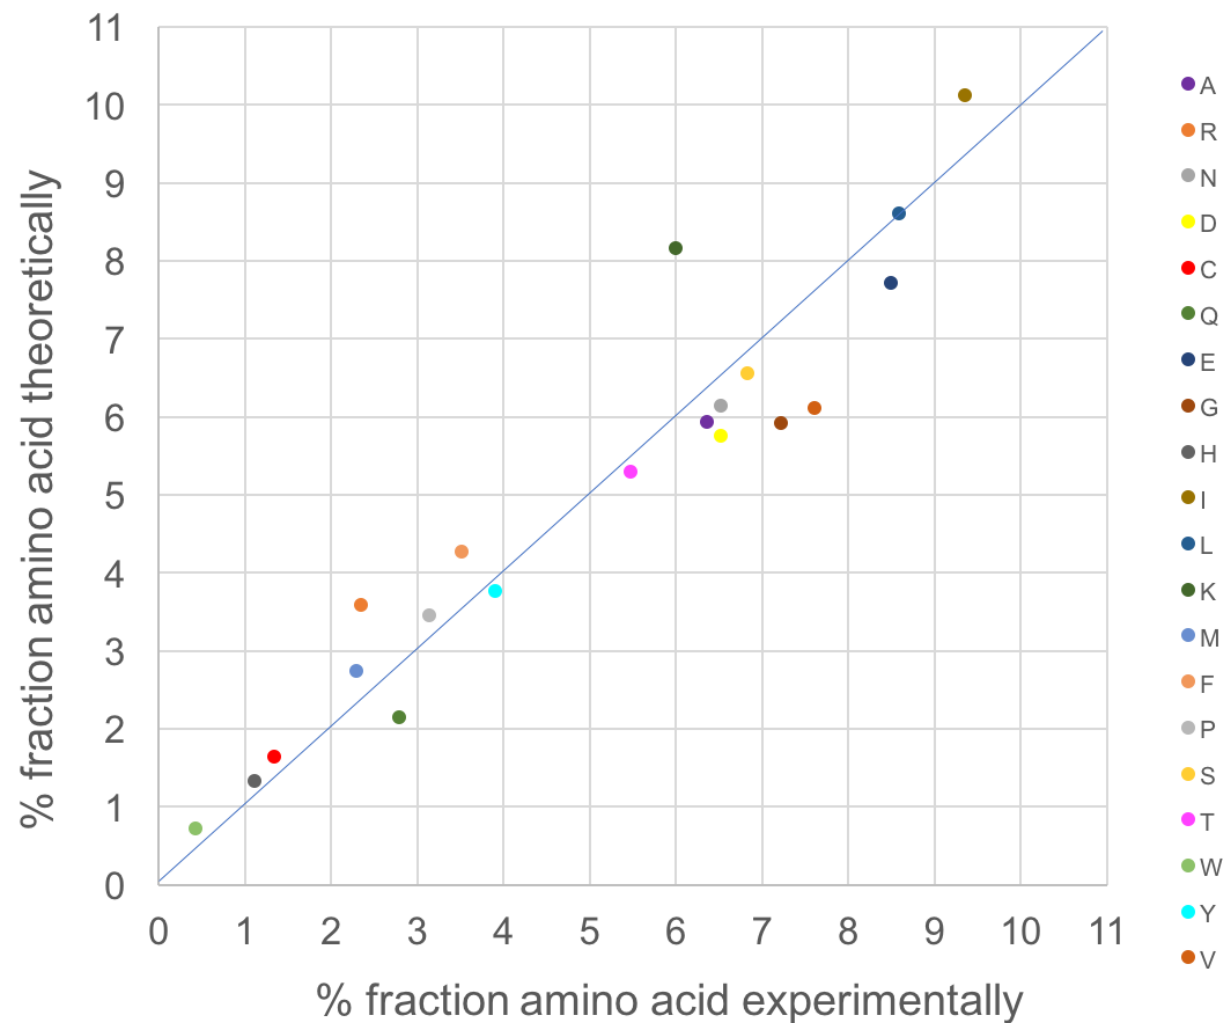

**Fig. S2:** Scatterplot of the percentaged fraction of amino acid residues experimentally identified and the percentaged fraction in the theoretical proteome of *C. difficile* for each of the 20 amino acids.

**Figure S3**

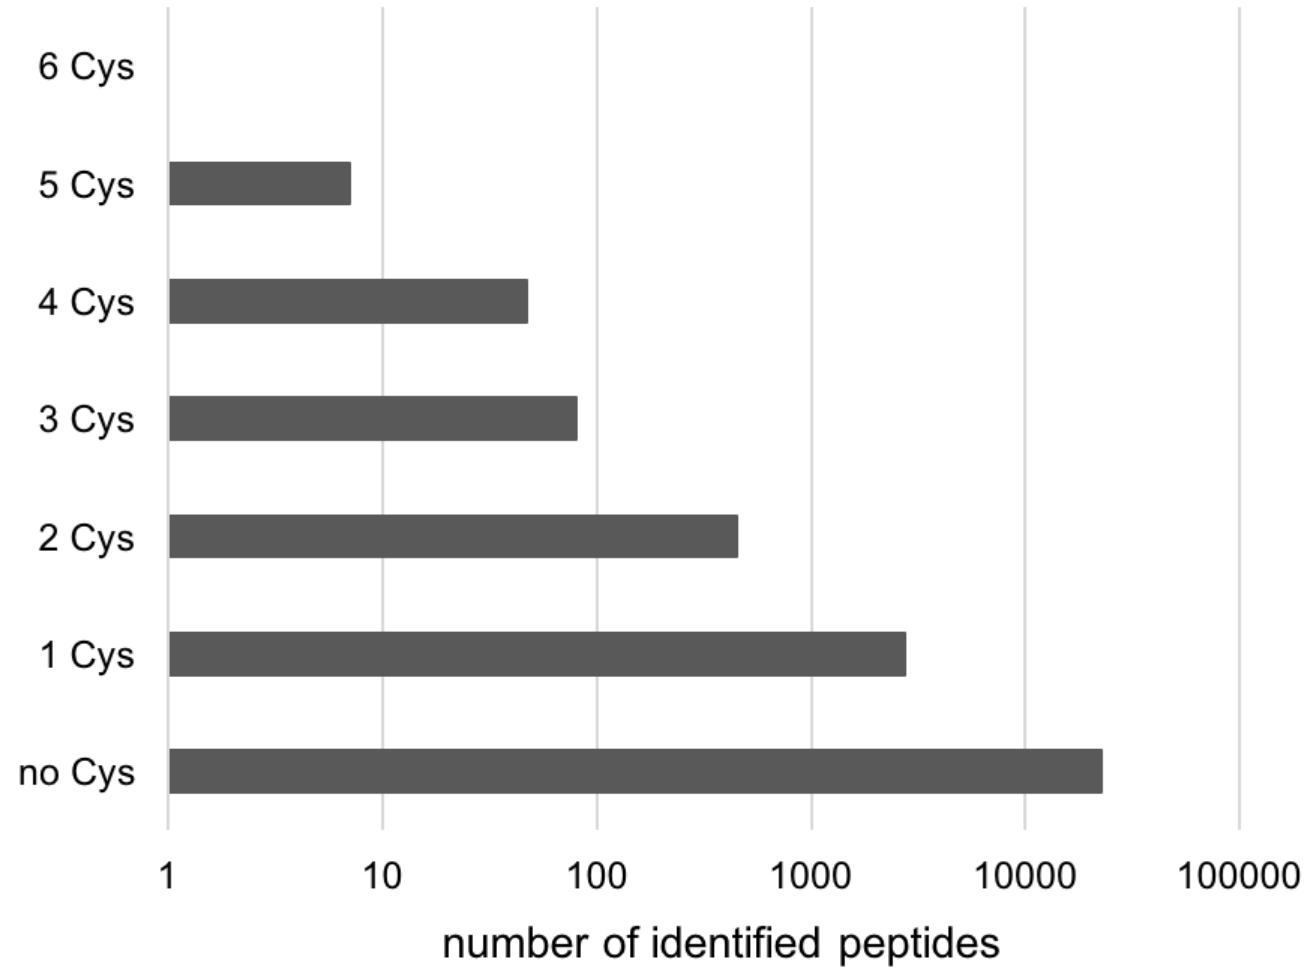

**Fig. S3:** Of the 26,380 detected unique peptides (different primary sequence) 3,332 peptides contain one or more cysteine residues. All cysteine containing peptide sequences are given supplementary in Table S1.

Figure S4

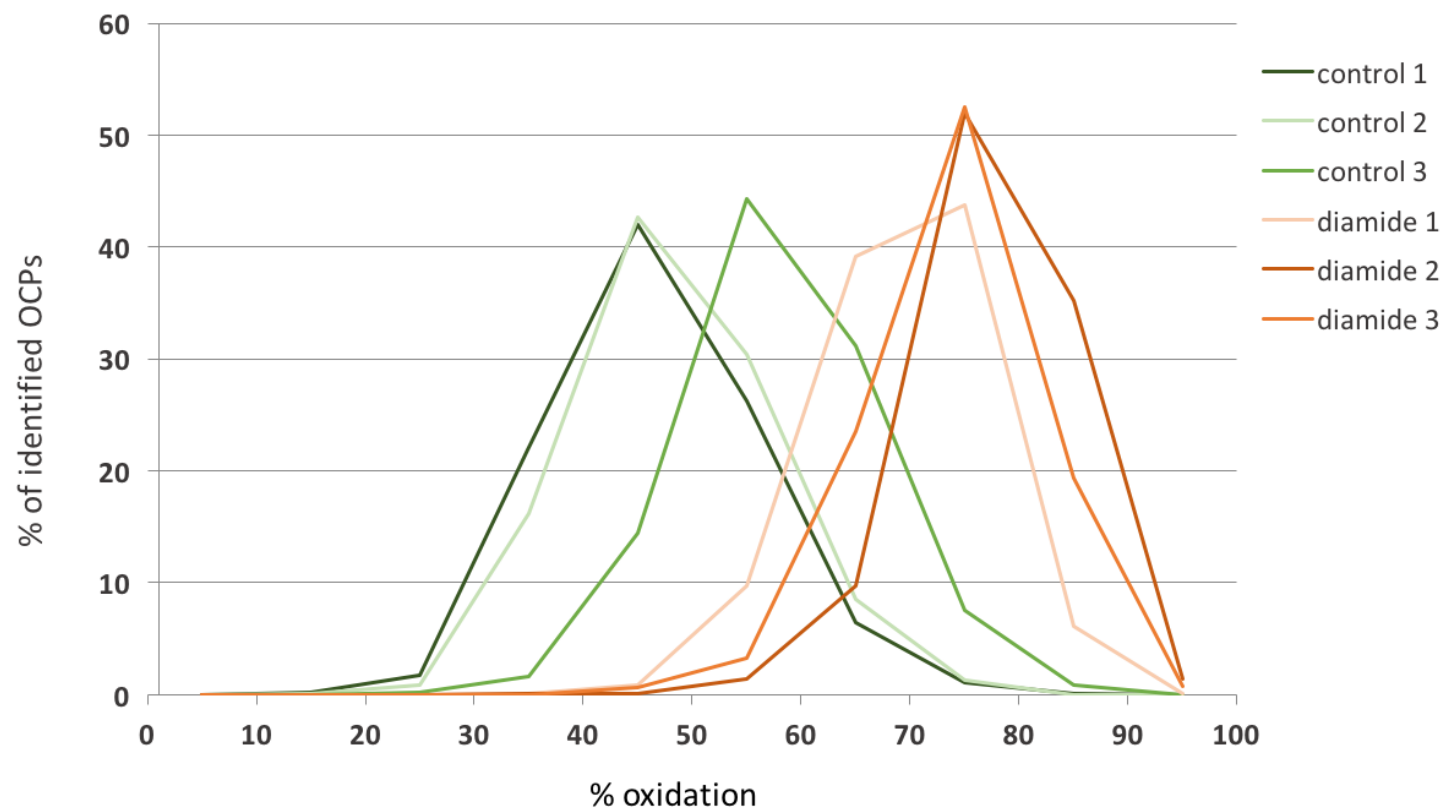

**Fig. S4:** Distribution of iodoTMT redox quantified OCPs according to their extent of oxidation. Three independent experiments of control samples and diamide shocked samples are plotted.



**Figure S5**

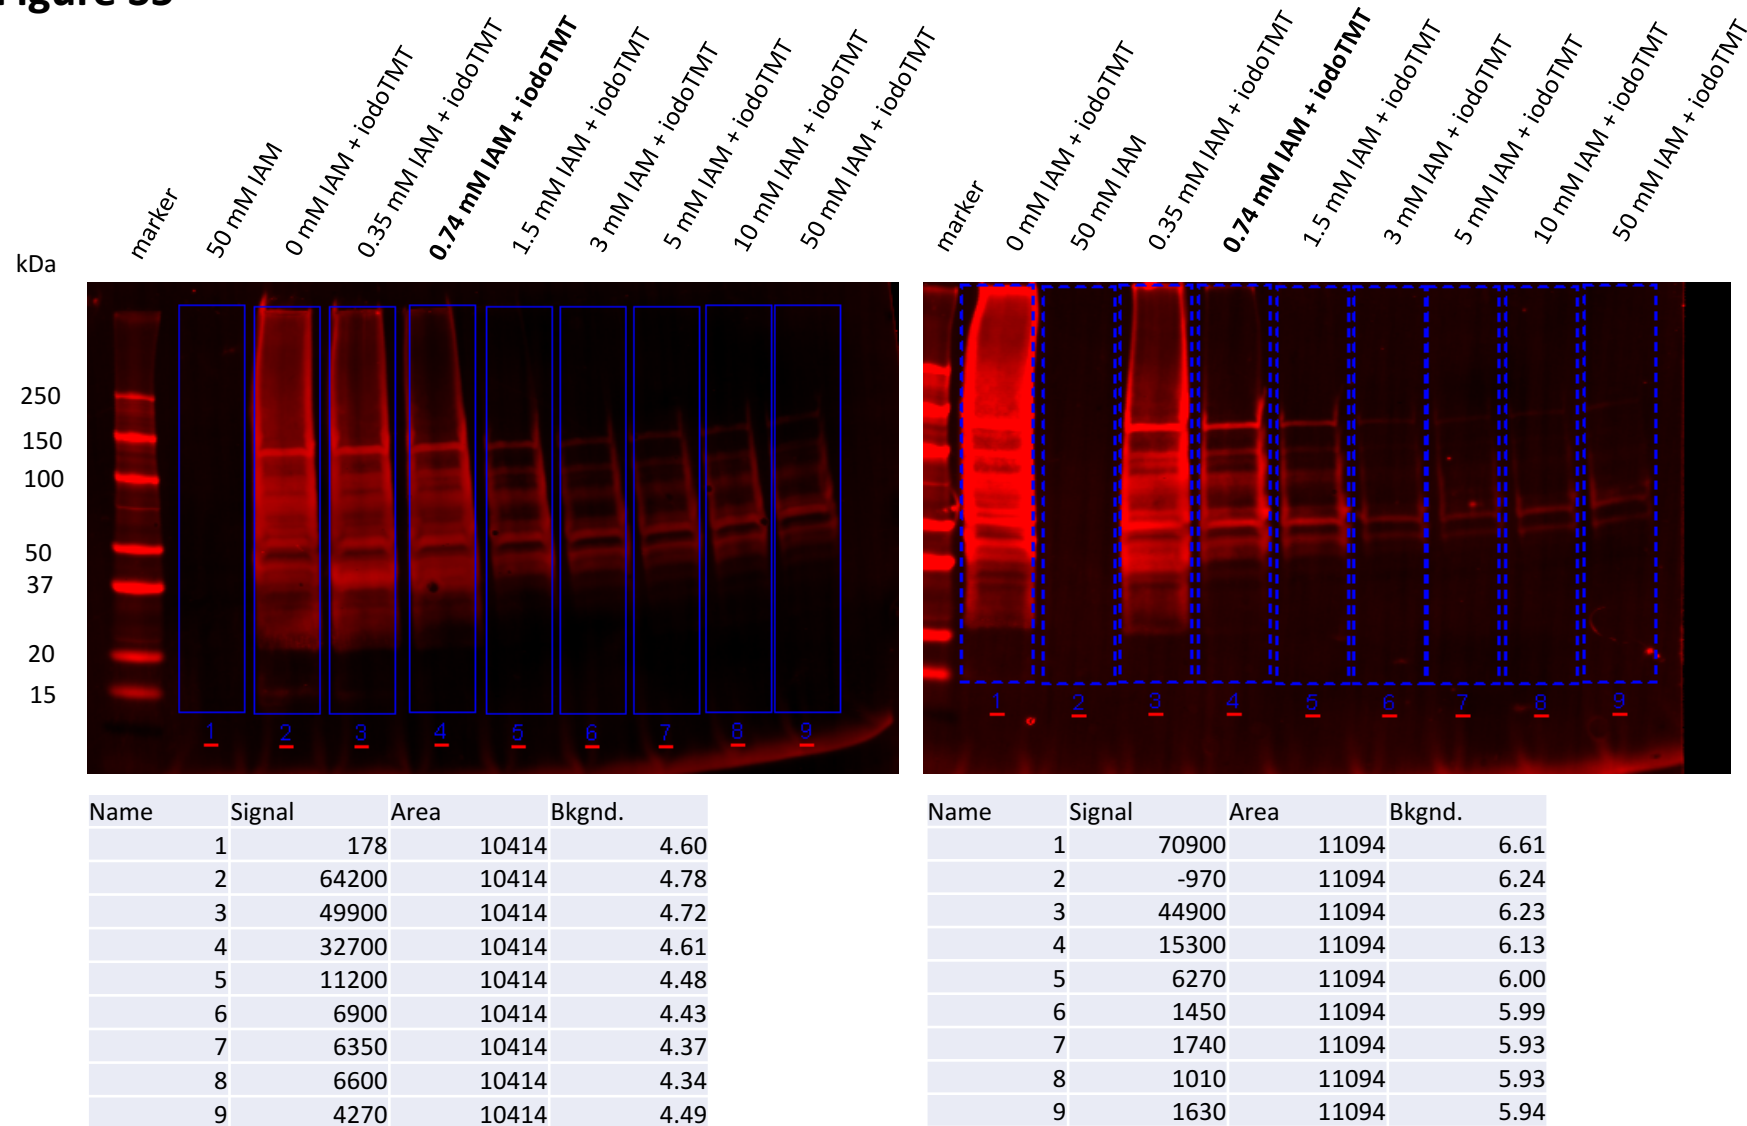

**Fig. S5:** Proteins were alkylated in a 1<sup>st</sup> step with the specified concentrations of iodoacetamide (IAM) and in a 2<sup>nd</sup> step with iodoTMTzero. Proteins were separated by SDS-PAGE and iodoTMTzero detected via Western Blotting. A concentration of 0.74 mM alkylating agent in the 1<sup>st</sup> alkylation step corresponds to the amount used in the iodoTMT protocol for a differential cysteine labelling. Intensity of iodoTMT specific signals of the lanes is provided in the tables below. Results of two independent experiments are presented.

Figure S6

a)

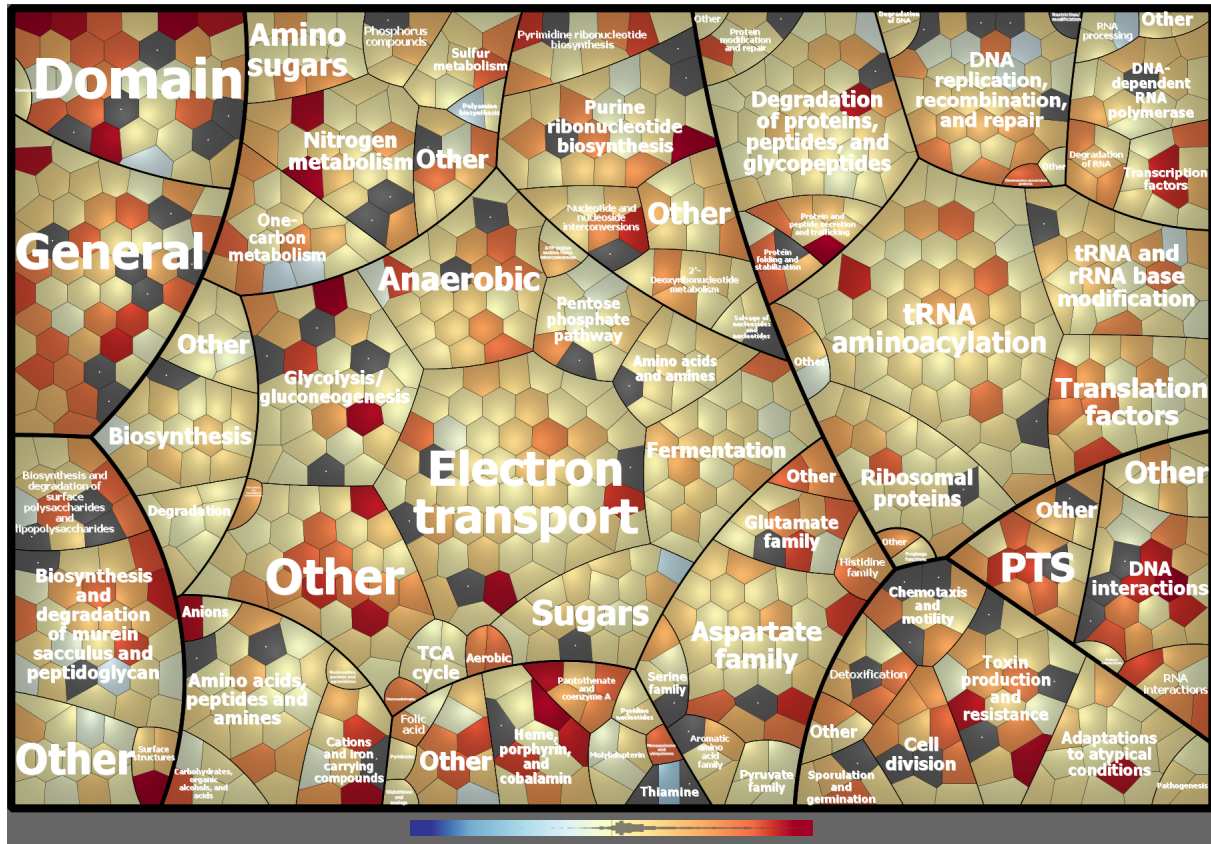

b)

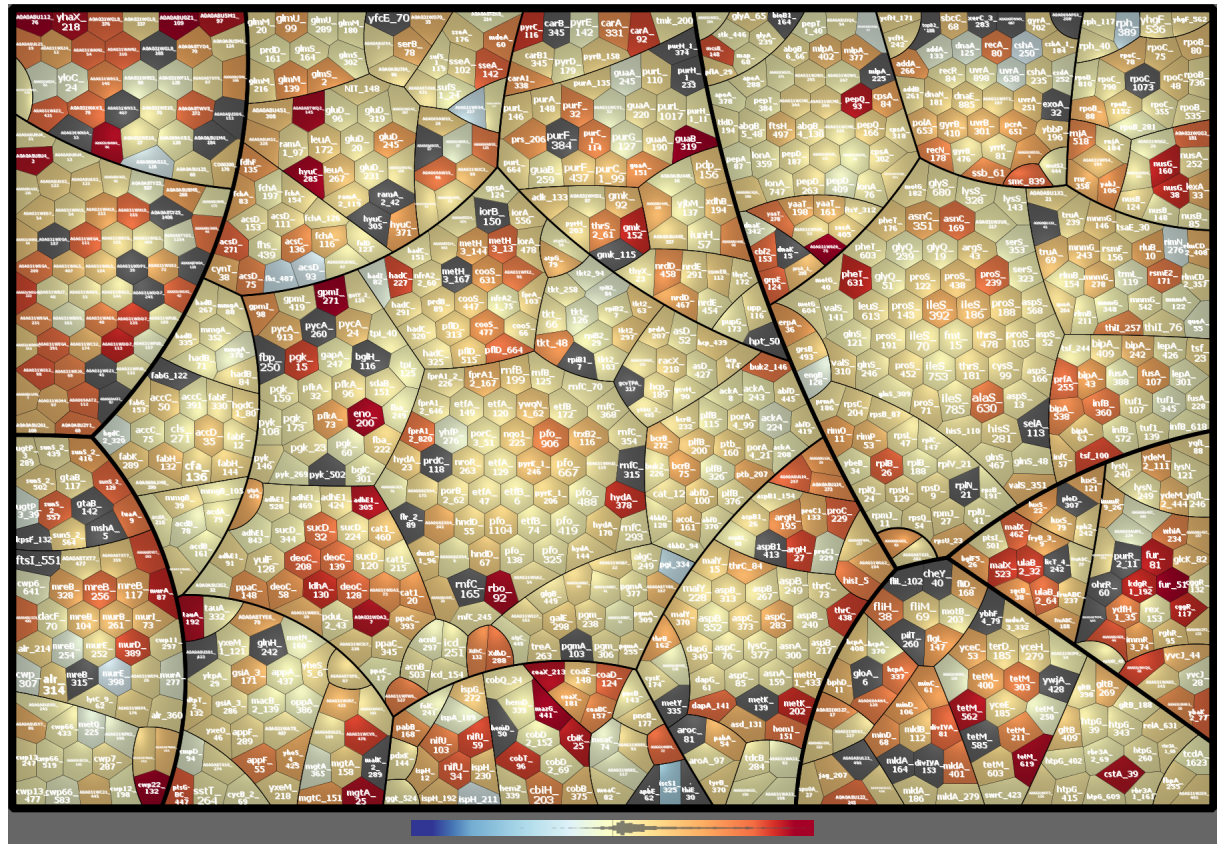





## Figure S7

a)

MSMLNKKTIEDIDV<sup>60%</sup>C<sup>6%</sup>GKKVLVR<sup>6%</sup>CDFNVPLQDGVITDENRLNGALPTIQYLISKGAK  
-2%  
VIL<sup>-2%</sup>CSHLGKPKGEAKPELSLAPVAKRLSEMLGKEVVFAADDNVVGENAKKATEKME  
NGDVVLLENTRYRKEETKNEENFSKELASLAEIFVNDAFGTAHRAH<sup>5%</sup>C<sup>5%</sup>STVGAGEFL  
4%  
QERV<sup>4%</sup>CGYLIQKELKFLGEAVANPVRPFTAILGGAKVSDKLAVINELLEKVDNLIIGGG  
MAYTFLKAQGYEVGTSLLEIDKVEYAKEMMEKAKNKGVNLLL PVDVVMADHFAP  
DATPIVTE DANVKEDYMGLDMGPKTIANFVKTIKESKT VVWNGPMGVFEFENFA  
NGTLSVARAMAELTDATTVIGGGDSAAAVNQLGFGDKMTHVSTGGGASLEFLEG  
KELPGIAALDNK

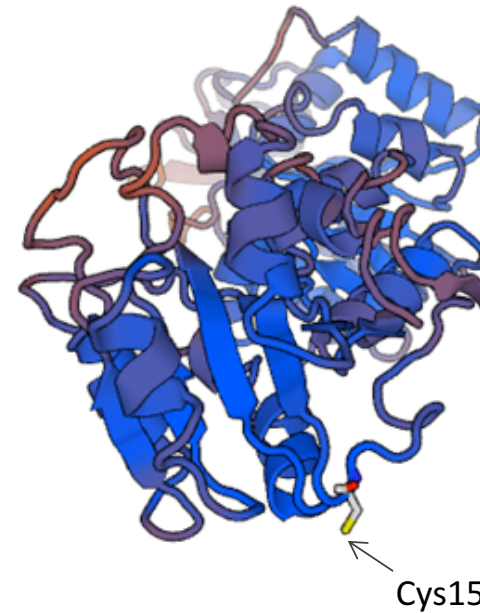

**Fig. S7a:** Phosphoglycerate kinase Pgc (A0A031WJX1) of *C. difficile* features five cysteine residues, which are enlarged and marked in red in the primary sequence. Underlined sequences of the protein have been identified. Percental increase in oxidation of redox-quantified cysteines after diamide shock is given on top of the according residues. All five cysteines of Pgc have been redox-quantified, but only Cys<sub>15</sub> is significantly oxidized with an increase of 60%. According to the homologueous structure of 3-phosphoglycerate kinase of *Bacillus stearothermophilus* (SWISS MODEL id1php.1) Cys<sub>15</sub> is surface exposed.

## Figure S7

b)

MAFKMSTQKYSKGKISEVEVGIGEKAIKLGGENVL  
PFYSFDGEVGNPKIGIQISDVYPESWTDSEKELYK  
45% -16%  
DVANCPVEWAKYVEANTQADFCCLKFDGSDPNG  
10%  
LDKSVDECADVAKAVIEAIKLPLVVAGSGNHEKD  
10%  
GKLFEKLAQTLDGHNCLFMSAVEDNYKGVGASA  
GMAYAHKVGAESSVDINLAKQLNVLTLQGVKGE  
NIVMNVGCSAVGYGYEYVASTMDRIRLAAFGQN  
56%  
DKTLQMPIITPVAFEVGHVKEAIAPIEDEPDWGC  
PEERTIAMEVSTAASVLVGGSSNAVILRHPKSIETIK  
ELVNALA

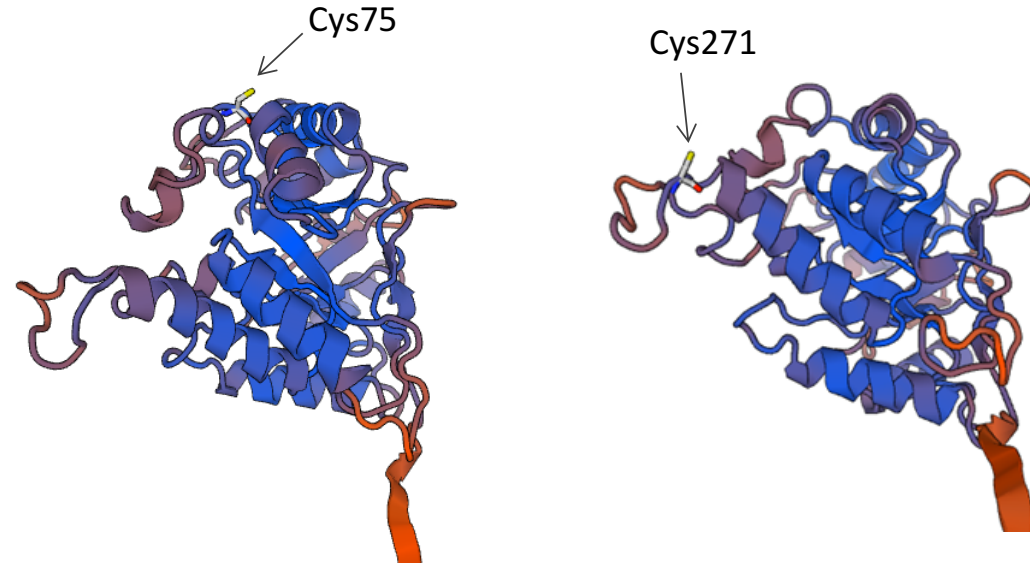

**Fig. S7b:** Five of six cysteines of Acetyl-CoA decarboxylase AcsD (A0A031WGJ0) could be redox-quantified. Two of them (Cys<sub>75</sub> and Cys<sub>271</sub>) were significantly oxidized by 45% and 56%, respectively. According to the homologous structure of a folate-bound corrinoid iron-sulfur protein (id4dje.1) both cysteine residues are surface exposed.



## Figure S7

c) MSVGLDVTNNVESLVKKLAKIREAQKIFATYSQEQVDKIFLAASLAANKQRVPLAIMAQKETGMGIAEDK  
9%  
VIKNHYASEYIYNAYKETKTCGVIEKDEAFGMTKIAEPIGVIAAVVPTTNPTSTAIFKALLALKTRNGIIFSPH  
PRAKNSTIEAAKVVLEAAVLAGAPEGIIGWIDEPSLELTTTVMKEVDLTLATGGPGMVKSAYSSGKPAIGV  
GAGNTPAIIDDSADIKTAVNSILVSKTFDNGMICASEQSVIVLENIYNEVKKKFKERGAYLLDKDETEKIRNII  
68%  
LVNGGLNSKIVGQTACTIAKLAGFEVPVDTKVLIGEVESEIEEFAHEKLSPLVAMYKASDFDDAVRKA  
9%  
KLVEDGGFGHTSSLYIDDVNQREKLDKFTSAMKTCRILINTPSSQGGIGDLYNFKLAPSLTLGCGSWGGN  
4%  
SVSENVGVKHLNLIKVAERRENMLWFRAPEKVYFKKGCLGVALKELKDV MNKKRAFIVTDTFLYNNGY  
6%  
TKAVTDLLDEMNIKHTTFFVEVPDPTLECAKIGAKAMREFNPDVVISIGGGSAMDAGKIMWTLYEHPDV  
DFQDLAMRFMDIRKRVYTFPKMGEKANFVAIPTSAAGTGSEVTPFAVITDQDTGVKYPLADYELMPNMA  
IVDSMMMMNMPKSLTSASGIDALTHALEAYVSMLATDYTNGLALQAIKSIFEYLPRAYDNGAKDPEARE  
KMANASTMAGMAFANAFLGVCHSMAHKLGAFFHVPHG VANALLITEVMKFNSSDAPKMGAFSQY  
KYPEALKRYAGIASFLGLKGN SDEEFQSLVAIEDLKLKVGIPKSIKEFGVEESKFMSIDEMVIQAFDDQ  
2%  
CTGANPRYPLMNEIKDMYLNSSYYGR

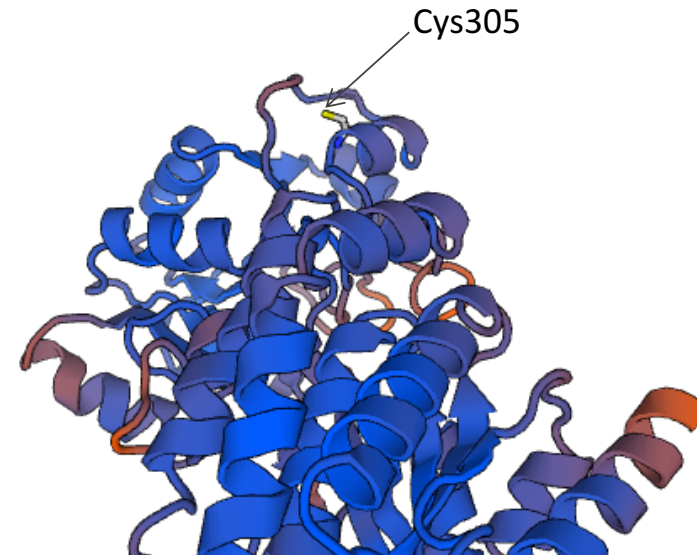

**Fig. S7c:** Alcohol dehydrogenase AdhE1 (A0A0A8U1W3) features nine cysteine residues. Six of them could be redox-quantified, but only Cys<sub>305</sub> was significantly oxidized by 68%. In a homologous structure of an acetylating aldehyde dehydrogenase from *Geobacillus thermoglucosidasius* (id5j78.1) Cys<sub>305</sub> is located at the protein surface.
